# Supplementary material for: Decreased SIRT1 expression in the peripheral blood of patients with Graves’ disease
Source: PubMed Central journal article supplement (PMC7354706; doi:10.1530/joe-19-0501), 2020-06-02
Supplement: supplementary_figure_1.pdf [file supplementary_figure_1.pdf]

**A****B****C****D****E****G****G****H**
