# Supplementary material for: Decreased SIRT1 expression in the peripheral blood of patients with Graves’ disease
Source: PubMed Central journal article supplement (PMC7354706; doi:10.1530/joe-19-0501), 2020-06-02
Supplement: supplementary_table_1.pdf [file supplementary_table_1.pdf]

**Supplementary Table 1. The clinical characteristics of patients with Hashimoto thyroiditis and healthy controls.**

| <b>Variable</b> | <b>HC</b> | <b>HT</b>     | <b>Normal Range</b> |
|-----------------|-----------|---------------|---------------------|
| No.             | 30        | 17            | -                   |
| Age (years)     | 35±12     | 38±14         | -                   |
| Gender (M/F)    | 8/22      | 1/16          | -                   |
| FT3 (pmol/L)    | 4.2±0.5   | 4.3±0.7       | 2.63-5.70           |
| FT4 (pmol/L)    | 12.6±2.8  | 12.8±3.6      | 9.01-19.04          |
| TSH (μIU/mL)    | 2.19±0.85 | 3.16±2.64     | 0.3500-4.9400       |
| TRAb (IU/L)     | -         | -             | < 1.75              |
| TPOAb (IU/ml)   | 1.30±1.71 | 336.65±356.21 | < 5.61              |
| TGAb (IU/ml)    | 0.79±1.19 | 494.51±340.15 | < 4.11              |

Data are expressed as mean ± standard deviation according to the distribution.

M, male; F, female. “-” represents that the experiment was not performed, or the data

are not available. HT, Hashimoto thyroiditis; HC, healthy control.
