# Supplementary material for: Decreased SIRT1 expression in the peripheral blood of patients with Graves’ disease
Source: PubMed Central journal article supplement (PMC7354706; doi:10.1530/joe-19-0501), 2020-06-02
Supplement: supplementary_table_2.pdf [file supplementary_table_2.pdf]

**Supplementary Table 2. Changes in clinical characteristics in patients with Graves' disease at baseline and following therapy of methimazole.**

| <b>Variable</b> | <b>Initial GD</b> | <b>Euthyroid GD</b> | <b><i>P</i></b> |
|-----------------|-------------------|---------------------|-----------------|
| No.(M/F)        | 15(1/14)          | 15(1/14)            |                 |
| Age             | 37±15             | 37±15               |                 |
| FT3 (pmol/L)    | 28.8±16.6         | 4.0±0.7             | <0.001          |
| FT4 (pmol/L)    | 43.4±14.8         | 12.8±2.2            | <0.001          |
| TSH (μIU/mL)    | 0.001±0.0002      | 1.49±0.47           | 0.006           |
| TRAb (IU/L)     | 16.2±9.7          | 6.7±5.1             | <0.001          |
| TPOAb(IU/ml)    | 463.1±406.5       | 302.0±387.1         | 0.017           |
| TGAb (IU/ml)    | 119.0±141.5       | 36.2±75.8           | 0.011           |

Data are expressed as mean ± standard deviation according to the distribution.

M, male; F, female.
