# Supplementary material for: Decreased SIRT1 expression in the peripheral blood of patients with Graves’ disease
Source: PubMed Central journal article supplement (PMC7354706; doi:10.1530/joe-19-0501), 2020-06-02
Supplement: supplementary_table_3.pdf [file supplementary_table_3.pdf]

**Supplementary Table 3. Primers sequences used for qRT-PCR in the study.**

|               | Forward primer        | Reverse primer          |
|---------------|-----------------------|-------------------------|
| SIRT1         | TAGGCGGCTTGATGGTAA    | ATGGGTTCTTCTAAACTTGG    |
| MCP1          | TCAAACCTGAAGCTCGCACTC | ATTGATTGCATCTGGCTGAG    |
| IL-6          | GACAGCCACTCACCTCTTCA  | CCTCTTTGCTGCTTTCACAC    |
| TNF- $\alpha$ | TTTGATCCCTGACATCTGGA  | GGCCTAAGGTCCACTTGTGT    |
| IL-8          | AGGACAAGAGCCAGGAAGAA  | ACTGCACCTTCACACAGAGC    |
| P65           | AGCACAGATACCACCAAGAC  | TGGTCCCGTGAAATACACCT    |
| GADPH         | GGAGCGAGATCCCTCCAAAAT | GGCTGTTGTCATACTTCTCATGG |
